# Supplementary material for: Microwave dielectric heating of non-aqueous droplets in a microfluidic device for nanoparticle synthesis
Source: Royal Society of Chemistry journal article supplement (doi:10.1039/c3nr00500c), 2013-01-01
Supplement: c3nr00500c.pdf [file c3nr00500c.pdf]

## **Microwave dielectric heating of non-aqueous droplets in a microfluidic device for nanoparticles synthesis**

***Dorota Koziej,<sup>a,b,\*</sup> Caspar Floryan,<sup>a</sup> Ralph A. Sperling,<sup>a</sup> Allen Ehrlicher,<sup>a</sup> David Issadore,<sup>c,d</sup> Robert Westervelt,<sup>a</sup> and David A. Weitz,<sup>a</sup>***

<sup>a</sup> *School of Engineering and Applied Sciences, Department of Physics, Harvard University, Cambridge, MA 02138, USA. Tel: 01 61 7496 9788;*

<sup>b</sup> *ETH Zürich, Department of Materials, Laboratory for Multifunctional Materials, 8093 Zurich, Switzerland. Fax: 04 14 633 15 45; Tel: 04 14 4633 6055; E-mail [koziejd@mat.ethz.ch](mailto:koziejd@mat.ethz.ch)*

<sup>c</sup> *Center for Systems Biology, Massachusetts General Hospital, Boston, MA 02114, USA*

<sup>d</sup> *Department of Bioengineering, School of Engineering and Applied Science, University of Pennsylvania, Philadelphia, Pennsylvania, USA*

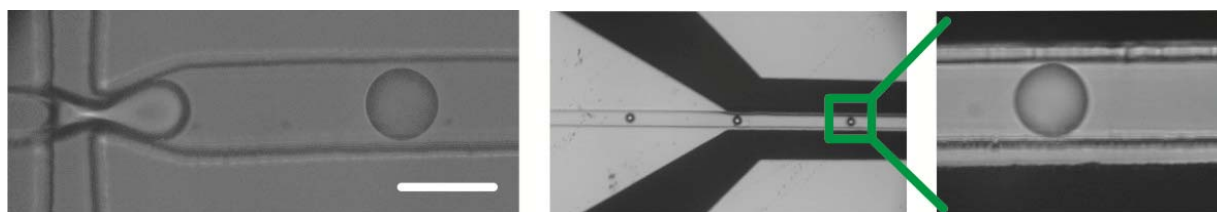

**Figure SI 1** Images of the microfluidic device. From left: flow focusing droplet maker and images of the droplets entering microwave heater. Scale bar 50  $\mu\text{m}$ .

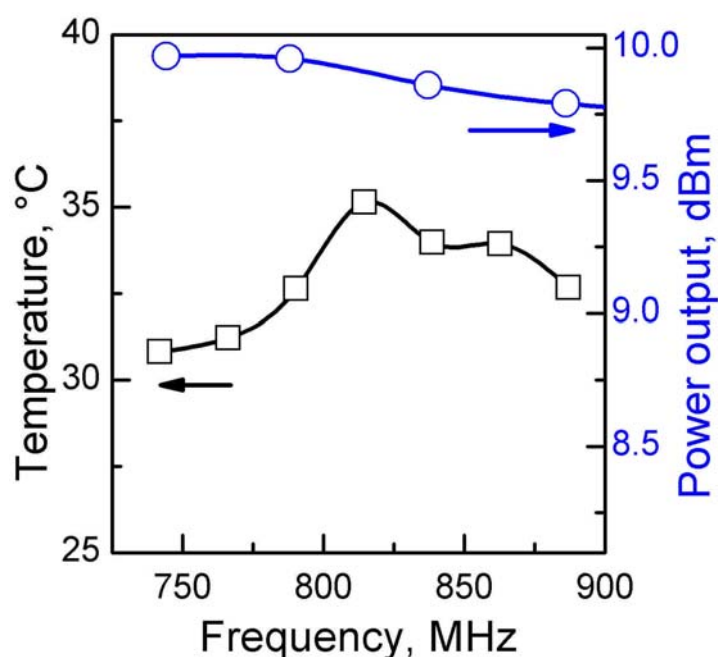

**Figure SI 2** Correlation between the microwave frequency and the temperature of the benzyl alcohol droplets. The frequency power dependence of power output of the voltage-controlled oscillator was taken from data sheet of ZX95-1200W+, Mini-Circuits (blue circles). The temperature was measured with IR camera (black squares; see Material and Methods for details). The experiments are performed at a constant flow rate of benzyl alcohol of 20  $\mu\text{l/h}$  and the oil at 120  $\mu\text{l/h}$ , at peak-to-peak voltage of 8.85 V. Although the output power in the frequency range of 700-900 MHz changes no more than 3%, the temperature of the benzyl alcohol droplets changes of about 13%. This dependence correlates with the dependence of dissipation factor ( $\tan\delta$ ) of benzyl alcohol on frequency.<sup>1</sup>

**Table SI 1** Summary of dielectric properties of common solvents used for non-aqueous synthesis.

| Solvent           | $\tau$ [ps] | $\tan\delta$   | $f$ [MHz]    | Ref.            |
|-------------------|-------------|----------------|--------------|-----------------|
| benzyl alcohol    | 188         | 0.546<br>0.587 | 700<br>900   | <sup>1</sup>    |
| 2-butanol         | 378.20      | 0.923<br>0.833 | 700<br>900   | <sup>2</sup>    |
| glycerol          | 1215.6      | 0.866<br>0.759 | 433.9<br>900 | <sup>3</sup>    |
| diethylene glycol | 112.87      | 0.520          | 900          | <sup>3, 4</sup> |
| hexanol           | 976         | 0.568<br>0.341 | 433.9<br>900 | <sup>3</sup>    |

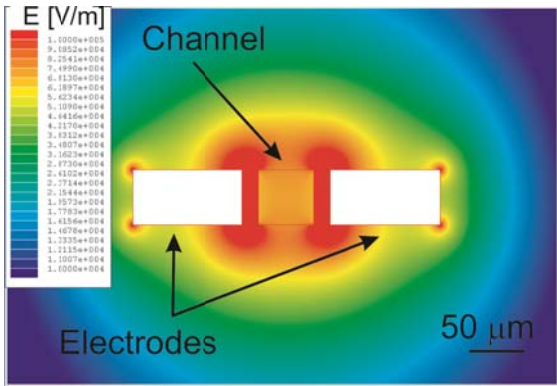

**Figure SI 3** A quasi-static electric field simulation superimposed on a cross section of the microwave oven at 12 V peak-to-peak voltage.

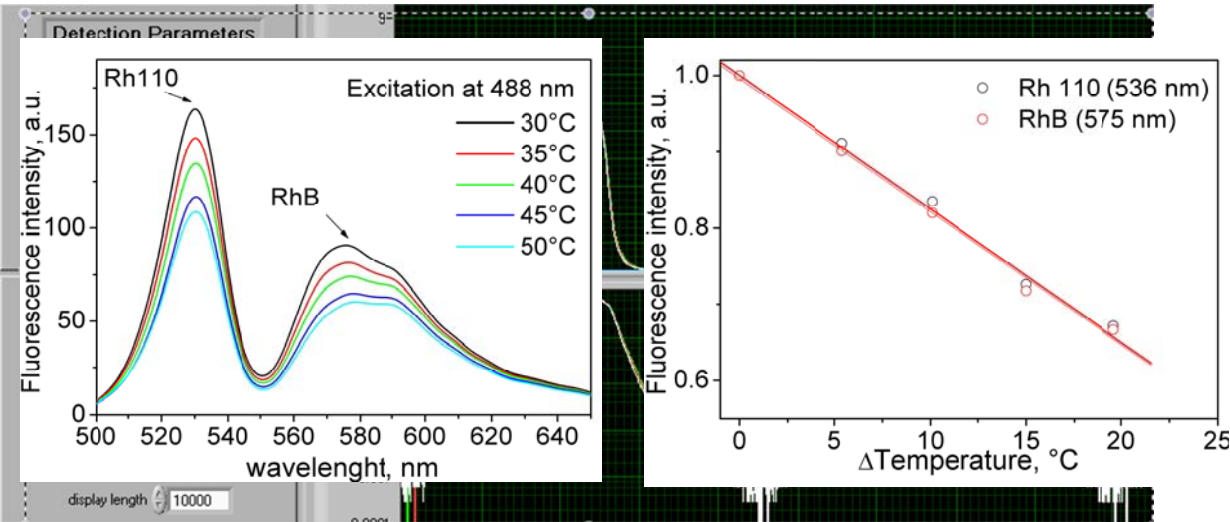

**Figure SI 4** Wavelength scan fluorescence spectra of rhodamine B and rhodamine 110 three different dyes inside single droplets. In this case fluorescence emission of rhodamine B dissolved in benzyl alcohol at varying rhodamine 110 in benzyl alcohol.

and rhodamine 110 are represented by red and green color respectively. The background fluorescence level detection is set to 1 V and the maximum to 10 V.

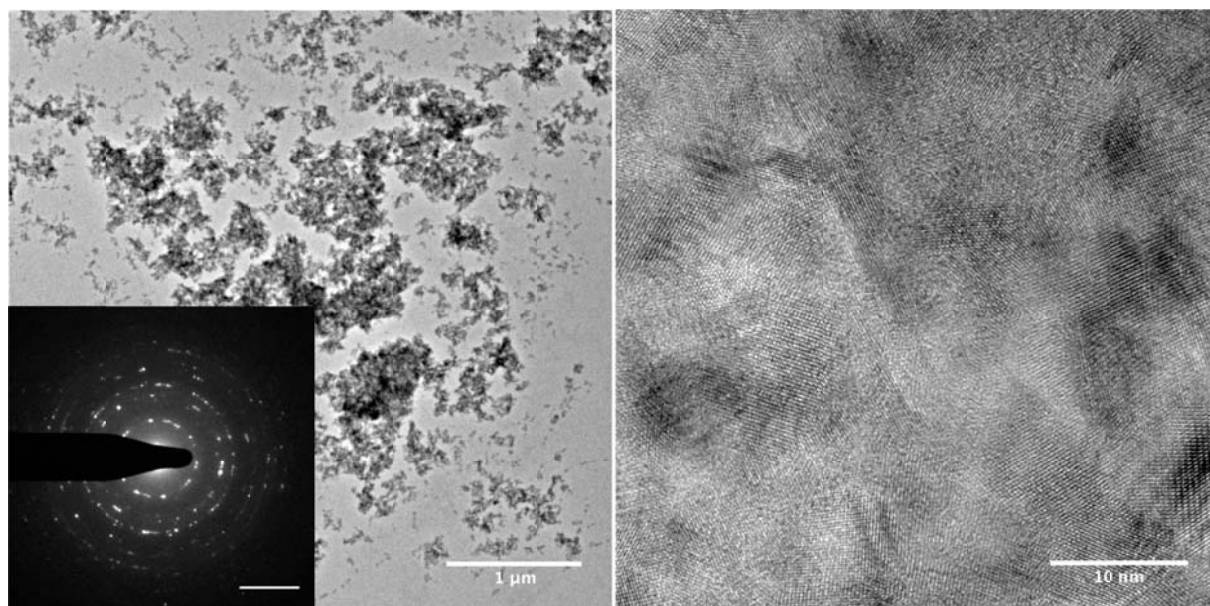

**Figure SI 7** TEM, HR-TEM and SEAD (inset scale bar 1/5nm) of nanoparticles washed with ethanol.

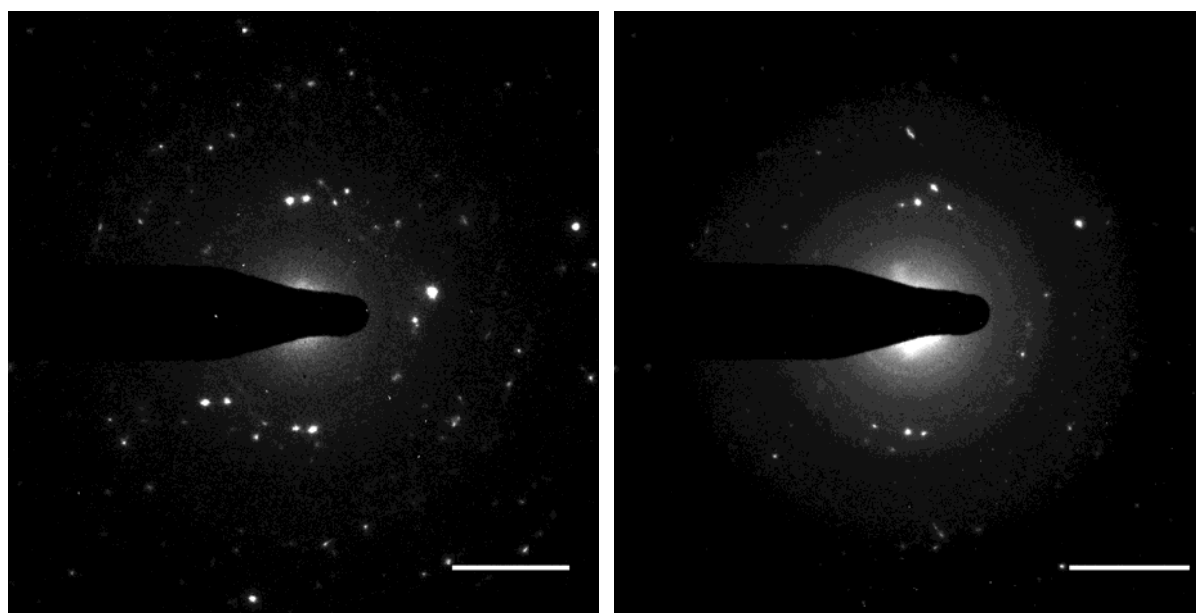

**Figure SI 8** SEAD patterns recorded consecutively at the same spot (scale bar 5  $1/\text{nm}$ ).

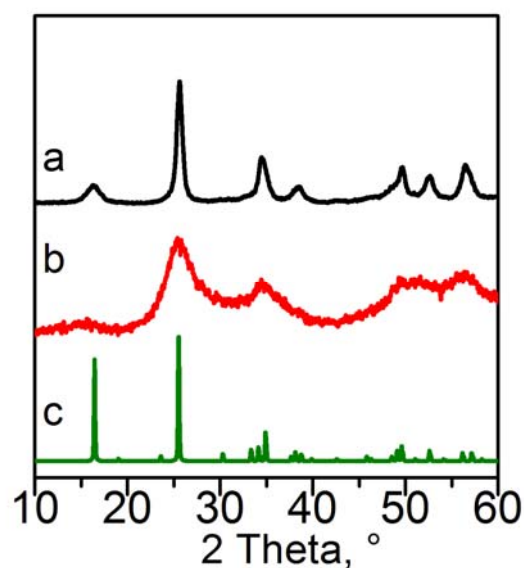

**SI Figure 9** XRD patterns of reaction product synthesized in conventional laboratory microwave: (a) 120°C, (b) at 60°C, c. reference pattern of  $\text{WO}_3 \cdot \text{H}_2\text{O}$ , ICDD Nr. 00-018-1418.

## References Supporting Information

- (1) Gestblom, B. *Chem. Phys. Lett.* **1980**, *74*, 333-336.
- (2) Komarov, V., Wang S., Tang J., In *The Wiley Encyclopedia of RF and Microwave Engineering*; Chang, K., Ed.; John Wiley & Sons, Inc.: New York, 2005; Vol. 4, pp 3693-3711.
- (3) Gabriel, C.; Gabriel, S.; Grant, E. H.; Halstead, B. S. J.; Mingos, D. M. P. *Chem. Soc. Rev.* **1998**, *27*, 213-223.
- (4) Sengwa, R. J.; Kaur, K.; Chaudhary, R. *Polym. Int.* **2000**, *49*, 599-608.
